# Supplementary material
Source: Springer Nature journal article supplement (https://www.springermedizin.de/resource/supplementary/12874_2012_774_MOESM1_ESM.pdf/9432926)
Supplement: MOESM1 [file 9432926]

# Supplementary materials

## t-tests, non-parametric tests, and large studies—a paradox of statistical practice?

Morten W. Fagerland

Unit of Biostatistics and Epidemiology, Oslo University Hospital, Norway

### Explanation for the color codings in the tables

Tables 1.1, 2.1, 3.1, . . .

- Green cells: the rejection rates ( $rr$ ) are within 10% of the nominal level ( $4.5 \leq rr \leq 5.5$ )
- Yellow cells: the rejection rates are within 20% of the nominal level ( $4.0 \leq rr \leq 6.0$ )
- Red cells: the rejection rates differ by more than 20% from the nominal level ( $rr < 4.0$  or  $rr > 6.0$ )

Tables 1.2, 2.2, 3.2, . . .

- Green cells: the probabilities ( $p$ ) are within 10% of 50% ( $45 \leq p \leq 55$ )
- Yellow cells: the probabilities are within 20% of 50% ( $40 \leq p \leq 60$ )
- Red cells: the probabilities differ by more than 20% from 50% ( $p < 40$  or  $p > 60$ )

| Content                                                                                                    | Page   |
|------------------------------------------------------------------------------------------------------------|--------|
| Tables of rejection rates and $\Pr(p_W < p_t)^*$ for 10 subjects in each group                             | 2      |
| Tables of rejection rates and $\Pr(p_W < p_t)^*$ for 25 subjects in each group                             | 3      |
| Tables of rejection rates and $\Pr(p_W < p_t)^*$ for 50 subjects in each group                             | 4      |
| Tables of rejection rates and $\Pr(p_W < p_t)^*$ for 100 subjects in each group                            | 5      |
| Tables of rejection rates and $\Pr(p_W < p_t)^*$ for 250 subjects in each group                            | 6      |
| Tables of rejection rates and $\Pr(p_W < p_t)^*$ for 500 subjects in each group                            | 7      |
| Tables of rejection rates and $\Pr(p_W < p_t)^*$ for 1000 subjects in each group                           | 8      |
| Plot of rejection rates against sample size for $\text{stdratio}^\dagger = 1.05$ and skewness = 1, 2, 3, 4 | 9, 10  |
| Plot of rejection rates against sample size for $\text{stdratio}^\dagger = 1.10$ and skewness = 1, 2, 3, 4 | 11, 12 |
| Plot of rejection rates against sample size for $\text{stdratio}^\dagger = 1.15$ and skewness = 1, 2, 3, 4 | 13, 14 |
| Plot of rejection rates against sample size for $\text{stdratio}^\dagger = 1.20$ and skewness = 1, 2, 3, 4 | 15, 16 |
| Plot of rejection rates against sample size for $\text{stdratio}^\dagger = 1.25$ and skewness = 1, 2, 3, 4 | 17, 18 |
| Plot of rejection rates against sample size for $\text{stdratio}^\dagger = 1.30$ and skewness = 1, 2, 3, 4 | 19, 20 |
| Plot of rejection rates against sample size for $\text{stdratio}^\dagger = 1.40$ and skewness = 1, 2, 3, 4 | 21, 22 |
| Plot of rejection rates against sample size for $\text{stdratio}^\dagger = 1.50$ and skewness = 1, 2, 3, 4 | 23, 24 |

\*Estimated probability that the  $p$ -value of the WMW test is smaller than that of the t-test

†Standard deviation ratio

## 10 subjects in each group

| gamma distributions |     |      |      | WMW test  | lognormal distributions |     |     |     |
|---------------------|-----|------|------|-----------|-------------------------|-----|-----|-----|
|                     |     |      |      | std.ratio |                         |     |     |     |
| 5.1                 | 8.2 | 14.9 | 25.9 | 1.50      | 5.4                     | 6.0 | 7.2 | 8.5 |
| 4.8                 | 6.6 | 13.1 | 23.7 | 1.40      | 4.7                     | 6.1 | 6.6 | 7.8 |
| 5.1                 | 5.9 | 12.1 | 21.5 | 1.30      | 4.4                     | 5.3 | 5.5 | 6.1 |
| 4.7                 | 5.6 | 10.2 | 19.5 | 1.25      | 4.5                     | 4.9 | 5.2 | 5.7 |
| 4.5                 | 5.5 | 8.2  | 17.1 | 1.20      | 4.6                     | 4.6 | 4.7 | 5.7 |
| 4.4                 | 5.0 | 7.4  | 14.7 | 1.15      | 4.3                     | 4.7 | 4.7 | 4.7 |
| 4.5                 | 4.5 | 6.3  | 12.1 | 1.10      | 4.2                     | 4.2 | 4.3 | 4.9 |
| 4.3                 | 4.3 | 5.1  | 8.5  | 1.05      | 4.1                     | 4.3 | 3.9 | 4.6 |
| <hr/>               |     |      |      |           | <hr/>                   |     |     |     |
| 1.0                 | 2.0 | 3.0  | 4.0  | skewness  | 1.0                     | 2.0 | 3.0 | 4.0 |
| gamma distributions |     |      |      | t-test    | lognormal distributions |     |     |     |
|                     |     |      |      | std.ratio |                         |     |     |     |
| 5.1                 | 5.0 | 5.3  | 6.0  | 1.50      | 5.5                     | 4.9 | 4.9 | 4.5 |
| 4.6                 | 4.5 | 4.9  | 4.5  | 1.40      | 4.9                     | 4.8 | 4.8 | 4.4 |
| 5.0                 | 4.0 | 3.9  | 4.1  | 1.30      | 4.4                     | 4.6 | 3.8 | 3.8 |
| 4.8                 | 4.1 | 3.6  | 3.4  | 1.25      | 5.1                     | 4.2 | 3.8 | 3.6 |
| 4.3                 | 4.2 | 3.3  | 2.9  | 1.20      | 4.7                     | 3.9 | 3.7 | 3.8 |
| 4.7                 | 4.1 | 2.9  | 2.5  | 1.15      | 4.3                     | 4.2 | 3.9 | 3.2 |
| 4.7                 | 3.9 | 2.8  | 2.2  | 1.10      | 4.5                     | 3.9 | 3.6 | 3.4 |
| 4.5                 | 3.7 | 2.8  | 2.1  | 1.05      | 4.4                     | 3.8 | 3.5 | 3.4 |
| <hr/>               |     |      |      |           | <hr/>                   |     |     |     |
| 1.0                 | 2.0 | 3.0  | 4.0  | skewness  | 1.0                     | 2.0 | 3.0 | 4.0 |

Table 1.1: Rejection rates (%).

| gamma distributions |      |      |      |           | lognormal distributions |      |      |      |
|---------------------|------|------|------|-----------|-------------------------|------|------|------|
|                     |      |      |      | std.ratio |                         |      |      |      |
| 46.4                | 53.6 | 65.6 | 74.8 | 1.50      | 45.3                    | 47.9 | 50.1 | 54.1 |
| 45.0                | 51.7 | 63.1 | 73.3 | 1.40      | 44.0                    | 46.6 | 49.6 | 51.5 |
| 45.1                | 50.0 | 60.5 | 71.5 | 1.30      | 43.4                    | 45.8 | 46.1 | 49.6 |
| 43.7                | 48.6 | 58.8 | 69.7 | 1.25      | 44.1                    | 45.1 | 46.5 | 47.7 |
| 43.5                | 47.3 | 56.3 | 67.9 | 1.20      | 43.1                    | 43.4 | 45.3 | 45.6 |
| 42.2                | 46.1 | 54.1 | 64.7 | 1.15      | 42.6                    | 43.2 | 44.5 | 45.6 |
| 42.9                | 45.2 | 51.0 | 60.9 | 1.10      | 42.6                    | 42.6 | 43.8 | 43.6 |
| 42.6                | 43.7 | 47.3 | 55.4 | 1.05      | 43.4                    | 43.3 | 42.9 | 43.0 |
| <hr/>               |      |      |      |           | <hr/>                   |      |      |      |
| 1.0                 | 2.0  | 3.0  | 4.0  | skewness  | 1.0                     | 2.0  | 3.0  | 4.0  |

Table 1.2: Estimated probabilities (%) that the  $p$ -value of the WMW test is smaller than that of the t-test.

## 25 subjects in each group

| gamma distributions |      |      |      | WMW test  | lognormal distributions |     |      |      |
|---------------------|------|------|------|-----------|-------------------------|-----|------|------|
|                     |      |      |      | std.ratio |                         |     |      |      |
| 6.7                 | 13.5 | 32.7 | 58.4 | 1.50      | 6.0                     | 9.0 | 11.5 | 16.2 |
| 5.8                 | 11.2 | 28.5 | 54.3 | 1.40      | 5.9                     | 7.9 | 10.0 | 13.3 |
| 5.3                 | 8.9  | 24.2 | 48.1 | 1.30      | 5.5                     | 6.3 | 8.1  | 9.6  |
| 5.5                 | 8.2  | 19.9 | 43.1 | 1.25      | 5.0                     | 6.3 | 7.7  | 8.2  |
| 5.4                 | 7.2  | 16.8 | 38.3 | 1.20      | 5.1                     | 5.3 | 6.1  | 7.5  |
| 4.8                 | 6.3  | 12.8 | 32.0 | 1.15      | 5.3                     | 5.3 | 6.5  | 6.3  |
| 5.1                 | 5.6  | 10.3 | 24.7 | 1.10      | 4.5                     | 5.1 | 5.1  | 5.7  |
| 4.6                 | 5.2  | 6.4  | 15.5 | 1.05      | 4.6                     | 4.8 | 5.1  | 4.8  |
| 1.0                 | 2.0  | 3.0  | 4.0  | skewness  | 1.0                     | 2.0 | 3.0  | 4.0  |
| gamma distributions |      |      |      | t-test    | lognormal distributions |     |      |      |
|                     |      |      |      | std.ratio |                         |     |      |      |
| 5.3                 | 5.3  | 5.7  | 5.7  | 1.50      | 5.1                     | 5.1 | 4.9  | 5.1  |
| 4.6                 | 5.0  | 5.2  | 4.8  | 1.40      | 4.9                     | 5.2 | 4.8  | 4.9  |
| 4.7                 | 4.6  | 5.0  | 4.9  | 1.30      | 5.0                     | 4.6 | 4.4  | 4.7  |
| 5.1                 | 4.4  | 4.7  | 4.7  | 1.25      | 4.7                     | 5.3 | 4.5  | 4.5  |
| 5.1                 | 5.0  | 4.8  | 3.7  | 1.20      | 4.9                     | 4.6 | 4.4  | 4.3  |
| 4.7                 | 4.7  | 4.1  | 3.9  | 1.15      | 4.9                     | 4.8 | 4.3  | 4.2  |
| 5.2                 | 4.6  | 3.9  | 3.8  | 1.10      | 4.6                     | 4.6 | 4.3  | 4.3  |
| 4.7                 | 4.8  | 4.0  | 4.0  | 1.05      | 5.2                     | 4.7 | 4.4  | 3.8  |
| 1.0                 | 2.0  | 3.0  | 4.0  | skewness  | 1.0                     | 2.0 | 3.0  | 4.0  |

Table 2.1: Rejection rates (%).

| gamma distributions |      |      |      |           | lognormal distributions |      |      |      |
|---------------------|------|------|------|-----------|-------------------------|------|------|------|
|                     |      |      |      | std.ratio |                         |      |      |      |
| 51.7                | 64.4 | 79.9 | 88.5 | 1.50      | 52.4                    | 57.9 | 61.8 | 66.4 |
| 51.8                | 62.4 | 76.2 | 86.8 | 1.40      | 50.6                    | 54.7 | 58.4 | 62.4 |
| 50.1                | 58.9 | 73.5 | 84.9 | 1.30      | 49.1                    | 52.0 | 55.3 | 59.2 |
| 49.5                | 56.6 | 70.8 | 83.1 | 1.25      | 48.2                    | 51.8 | 53.4 | 55.9 |
| 48.4                | 55.3 | 67.8 | 81.0 | 1.20      | 47.7                    | 49.8 | 50.5 | 53.2 |
| 47.9                | 51.6 | 63.5 | 77.6 | 1.15      | 48.2                    | 48.6 | 50.5 | 51.2 |
| 47.4                | 50.3 | 58.7 | 72.8 | 1.10      | 47.3                    | 47.9 | 48.3 | 48.3 |
| 47.6                | 48.4 | 53.2 | 63.9 | 1.05      | 46.3                    | 47.0 | 46.6 | 47.5 |
| 1.0                 | 2.0  | 3.0  | 4.0  | skewness  | 1.0                     | 2.0  | 3.0  | 4.0  |

Table 2.2: Estimated probabilities (%) that the  $p$ -value of the WMW test is smaller than that of the t-test.

## 50 subjects in each group

| gamma distributions |      |      |      | WMW test  | lognormal distributions |      |      |      |
|---------------------|------|------|------|-----------|-------------------------|------|------|------|
|                     |      |      |      | std.ratio |                         |      |      |      |
| 8.6                 | 24.1 | 58.3 | 86.5 | 1.50      | 7.5                     | 13.8 | 20.6 | 28.2 |
| 7.6                 | 18.6 | 50.7 | 82.4 | 1.40      | 6.7                     | 10.7 | 16.4 | 21.9 |
| 6.1                 | 14.2 | 40.8 | 76.0 | 1.30      | 6.1                     | 8.6  | 12.3 | 16.3 |
| 6.5                 | 12.5 | 35.5 | 71.2 | 1.25      | 5.5                     | 7.7  | 10.4 | 13.4 |
| 5.6                 | 10.5 | 30.1 | 64.9 | 1.20      | 5.5                     | 6.9  | 8.5  | 10.5 |
| 5.5                 | 8.0  | 23.2 | 56.5 | 1.15      | 5.4                     | 6.1  | 7.2  | 8.6  |
| 5.1                 | 6.7  | 15.9 | 45.6 | 1.10      | 4.9                     | 5.4  | 6.1  | 6.5  |
| 5.3                 | 5.6  | 9.9  | 28.1 | 1.05      | 4.9                     | 4.6  | 5.5  | 5.5  |
| 1.0 2.0 3.0 4.0     |      |      |      | skewness  | 1.0 2.0 3.0 4.0         |      |      |      |
| gamma distributions |      |      |      | t-test    | lognormal distributions |      |      |      |
|                     |      |      |      | std.ratio |                         |      |      |      |
| 5.3                 | 5.2  | 5.4  | 5.1  | 1.50      | 4.7                     | 4.8  | 5.1  | 5.2  |
| 5.0                 | 5.0  | 5.5  | 5.2  | 1.40      | 4.9                     | 5.0  | 5.0  | 5.4  |
| 4.7                 | 4.7  | 4.8  | 5.0  | 1.30      | 4.9                     | 5.1  | 4.7  | 4.9  |
| 5.3                 | 5.0  | 4.9  | 4.7  | 1.25      | 4.7                     | 4.7  | 4.8  | 5.1  |
| 5.1                 | 4.9  | 4.6  | 4.2  | 1.20      | 5.0                     | 5.0  | 4.7  | 4.6  |
| 5.0                 | 5.0  | 4.7  | 4.6  | 1.15      | 5.1                     | 4.7  | 4.7  | 4.8  |
| 4.9                 | 5.0  | 5.0  | 4.4  | 1.10      | 4.5                     | 4.8  | 5.0  | 4.3  |
| 5.1                 | 4.8  | 4.7  | 4.4  | 1.05      | 5.0                     | 4.5  | 4.7  | 4.4  |
| 1.0 2.0 3.0 4.0     |      |      |      | skewness  | 1.0 2.0 3.0 4.0         |      |      |      |

Table 3.1: Rejection rates (%).

| gamma distributions |      |      |      |           | lognormal distributions |      |      |      |
|---------------------|------|------|------|-----------|-------------------------|------|------|------|
|                     |      |      |      | std.ratio |                         |      |      |      |
| 57.8                | 73.6 | 87.7 | 95.8 | 1.50      | 56.1                    | 64.5 | 71.5 | 76.6 |
| 56.2                | 70.5 | 85.5 | 94.6 | 1.40      | 54.7                    | 60.7 | 67.5 | 72.0 |
| 54.1                | 66.1 | 81.8 | 93.3 | 1.30      | 53.1                    | 57.8 | 61.6 | 66.6 |
| 52.5                | 63.5 | 79.8 | 91.9 | 1.25      | 51.6                    | 56.4 | 60.1 | 63.2 |
| 51.9                | 61.0 | 77.8 | 90.4 | 1.20      | 50.5                    | 54.3 | 56.8 | 59.9 |
| 50.2                | 57.9 | 72.2 | 87.0 | 1.15      | 50.2                    | 52.0 | 53.3 | 54.6 |
| 48.5                | 52.5 | 65.7 | 83.4 | 1.10      | 49.2                    | 49.3 | 51.5 | 52.0 |
| 49.5                | 49.9 | 57.5 | 74.3 | 1.05      | 48.0                    | 48.4 | 48.6 | 49.5 |
| 1.0 2.0 3.0 4.0     |      |      |      | skewness  | 1.0 2.0 3.0 4.0         |      |      |      |

Table 3.2: Estimated probabilities (%) that the  $p$ -value of the WMW test is smaller than that of the t-test.

## 100 subjects in each group

| gamma distributions |      |      |      | WMW test  | lognormal distributions |      |          |      |     |     |     |     |
|---------------------|------|------|------|-----------|-------------------------|------|----------|------|-----|-----|-----|-----|
|                     |      |      |      | std.ratio |                         |      |          |      |     |     |     |     |
| 11.7                | 40.4 | 84.5 | 99.0 | 1.50      | 9.6                     | 22.9 | 36.8     | 48.6 |     |     |     |     |
| 10.2                | 32.7 | 79.2 | 98.2 | 1.40      | 8.5                     | 17.2 | 27.6     | 37.7 |     |     |     |     |
| 7.8                 | 24.4 | 68.7 | 96.3 | 1.30      | 7.5                     | 12.9 | 20.4     | 27.2 |     |     |     |     |
| 7.4                 | 20.6 | 61.2 | 94.3 | 1.25      | 6.3                     | 11.0 | 16.0     | 22.3 |     |     |     |     |
| 6.3                 | 15.3 | 51.8 | 90.9 | 1.20      | 6.1                     | 8.8  | 12.3     | 17.7 |     |     |     |     |
| 5.5                 | 11.6 | 40.8 | 84.6 | 1.15      | 6.0                     | 7.3  | 9.4      | 12.3 |     |     |     |     |
| 5.1                 | 8.4  | 28.1 | 73.1 | 1.10      | 5.6                     | 5.6  | 7.0      | 8.2  |     |     |     |     |
| 5.0                 | 6.0  | 14.1 | 48.7 | 1.05      | 5.1                     | 5.0  | 5.8      | 5.9  |     |     |     |     |
| 1.0                 |      |      |      | 2.0       | 3.0                     | 4.0  | skewness |      | 1.0 | 2.0 | 3.0 | 4.0 |
| gamma distributions |      |      |      | t-test    | lognormal distributions |      |          |      |     |     |     |     |
|                     |      |      |      | std.ratio |                         |      |          |      |     |     |     |     |
| 5.1                 | 5.1  | 5.2  | 5.0  | 1.50      | 4.8                     | 5.1  | 5.1      | 5.2  |     |     |     |     |
| 5.0                 | 4.9  | 5.0  | 5.0  | 1.40      | 4.6                     | 4.6  | 4.8      | 4.9  |     |     |     |     |
| 5.1                 | 5.2  | 5.0  | 4.9  | 1.30      | 5.0                     | 5.1  | 5.2      | 4.6  |     |     |     |     |
| 4.9                 | 5.3  | 4.8  | 4.8  | 1.25      | 4.7                     | 4.9  | 4.7      | 4.8  |     |     |     |     |
| 4.6                 | 5.2  | 5.2  | 4.8  | 1.20      | 4.8                     | 5.1  | 4.9      | 4.5  |     |     |     |     |
| 5.0                 | 5.4  | 5.0  | 5.0  | 1.15      | 5.1                     | 5.0  | 4.8      | 5.0  |     |     |     |     |
| 4.7                 | 5.3  | 4.9  | 4.7  | 1.10      | 5.3                     | 4.7  | 4.6      | 4.8  |     |     |     |     |
| 4.9                 | 5.0  | 4.7  | 4.7  | 1.05      | 5.2                     | 4.8  | 5.0      | 4.8  |     |     |     |     |
| 1.0                 |      |      |      | 2.0       | 3.0                     | 4.0  | skewness |      | 1.0 | 2.0 | 3.0 | 4.0 |

Table 4.1: Rejection rates (%).

| gamma distributions |      |      |      |           | lognormal distributions |      |          |      |     |     |     |     |
|---------------------|------|------|------|-----------|-------------------------|------|----------|------|-----|-----|-----|-----|
|                     |      |      |      | std.ratio |                         |      |          |      |     |     |     |     |
| 64.2                | 82.0 | 94.8 | 99.3 | 1.50      | 61.4                    | 72.4 | 80.3     | 85.2 |     |     |     |     |
| 61.2                | 78.5 | 93.4 | 99.0 | 1.40      | 59.6                    | 69.5 | 75.8     | 81.0 |     |     |     |     |
| 58.3                | 73.4 | 90.8 | 98.1 | 1.30      | 56.6                    | 64.0 | 70.4     | 76.2 |     |     |     |     |
| 56.1                | 70.6 | 88.7 | 97.4 | 1.25      | 54.1                    | 62.0 | 67.3     | 72.0 |     |     |     |     |
| 54.2                | 67.3 | 85.2 | 96.6 | 1.20      | 53.9                    | 58.5 | 63.9     | 67.6 |     |     |     |     |
| 52.5                | 62.4 | 81.8 | 94.7 | 1.15      | 51.7                    | 55.8 | 58.7     | 61.5 |     |     |     |     |
| 51.0                | 58.0 | 75.1 | 92.0 | 1.10      | 50.6                    | 52.0 | 53.7     | 55.4 |     |     |     |     |
| 50.6                | 51.8 | 63.9 | 84.3 | 1.05      | 50.4                    | 50.1 | 50.3     | 50.8 |     |     |     |     |
| 1.0                 |      |      |      | 2.0       | 3.0                     | 4.0  | skewness |      | 1.0 | 2.0 | 3.0 | 4.0 |

Table 4.2: Estimated probabilities (%) that the  $p$ -value of the WMW test is smaller than that of the t-test.

## 250 subjects in each group

| gamma distributions |      |      |       | WMW test  | lognormal distributions |      |      |      |
|---------------------|------|------|-------|-----------|-------------------------|------|------|------|
|                     |      |      |       | std.ratio |                         |      |      |      |
| 20.4                | 76.9 | 99.7 | 100.0 | 1.50      | 17.6                    | 46.5 | 71.0 | 86.0 |
| 15.9                | 67.2 | 99.2 | 100.0 | 1.40      | 14.1                    | 36.0 | 58.4 | 75.0 |
| 11.8                | 50.6 | 96.9 | 100.0 | 1.30      | 11.3                    | 24.7 | 42.1 | 56.9 |
| 10.0                | 41.9 | 94.2 | 100.0 | 1.25      | 8.6                     | 19.5 | 33.6 | 45.8 |
| 8.4                 | 31.6 | 88.9 | 99.9  | 1.20      | 7.6                     | 14.9 | 24.3 | 34.4 |
| 6.9                 | 21.8 | 76.8 | 99.5  | 1.15      | 6.7                     | 11.0 | 16.7 | 22.9 |
| 6.0                 | 12.7 | 57.5 | 98.0  | 1.10      | 6.0                     | 7.8  | 10.6 | 13.5 |
| 5.5                 | 7.3  | 28.5 | 85.9  | 1.05      | 5.4                     | 5.9  | 6.5  | 7.2  |
| 1.0 2.0 3.0 4.0     |      |      |       | skewness  | 1.0 2.0 3.0 4.0         |      |      |      |
| gamma distributions |      |      |       | t-test    | lognormal distributions |      |      |      |
|                     |      |      |       | std.ratio |                         |      |      |      |
| 4.8                 | 5.0  | 5.4  | 5.2   | 1.50      | 5.1                     | 5.2  | 5.1  | 4.9  |
| 4.9                 | 5.0  | 4.8  | 4.9   | 1.40      | 4.8                     | 5.0  | 5.1  | 5.0  |
| 5.0                 | 5.0  | 5.3  | 4.5   | 1.30      | 4.8                     | 4.5  | 4.5  | 4.7  |
| 4.9                 | 5.1  | 5.2  | 4.9   | 1.25      | 4.6                     | 4.9  | 5.2  | 4.8  |
| 4.8                 | 4.8  | 4.8  | 4.9   | 1.20      | 5.0                     | 5.0  | 5.1  | 4.8  |
| 4.8                 | 5.1  | 5.0  | 5.0   | 1.15      | 4.7                     | 5.3  | 5.5  | 4.9  |
| 5.0                 | 4.8  | 4.9  | 4.8   | 1.10      | 5.0                     | 4.8  | 4.9  | 5.0  |
| 5.3                 | 5.1  | 4.7  | 4.7   | 1.05      | 5.0                     | 5.0  | 5.0  | 4.7  |
| 1.0 2.0 3.0 4.0     |      |      |       | skewness  | 1.0 2.0 3.0 4.0         |      |      |      |

Table 5.1: Rejection rates (%).

| gamma distributions |      |      |       |           | lognormal distributions |      |      |      |
|---------------------|------|------|-------|-----------|-------------------------|------|------|------|
|                     |      |      |       | std.ratio |                         |      |      |      |
| 71.8                | 92.0 | 99.5 | 100.0 | 1.50      | 69.6                    | 83.0 | 90.6 | 94.9 |
| 68.6                | 89.5 | 99.2 | 100.0 | 1.40      | 66.5                    | 79.6 | 87.2 | 92.2 |
| 64.8                | 84.5 | 98.1 | 100.0 | 1.30      | 63.1                    | 74.2 | 81.7 | 87.8 |
| 62.3                | 81.3 | 97.1 | 100.0 | 1.25      | 59.9                    | 71.2 | 78.9 | 83.4 |
| 59.4                | 77.1 | 95.7 | 99.8  | 1.20      | 58.4                    | 66.1 | 74.2 | 79.1 |
| 55.9                | 72.3 | 92.5 | 99.5  | 1.15      | 56.0                    | 61.9 | 67.4 | 72.4 |
| 53.6                | 65.2 | 87.5 | 98.6  | 1.10      | 52.6                    | 56.7 | 60.8 | 63.6 |
| 50.3                | 56.2 | 75.6 | 95.3  | 1.05      | 51.0                    | 51.9 | 52.3 | 54.5 |
| 1.0 2.0 3.0 4.0     |      |      |       | skewness  | 1.0 2.0 3.0 4.0         |      |      |      |

Table 5.2: Estimated probabilities (%) that the  $p$ -value of the WMW test is smaller than that of the t-test.

## 500 subjects in each group

| gamma distributions |      |       |       | WMW test  | lognormal distributions |      |      |      |
|---------------------|------|-------|-------|-----------|-------------------------|------|------|------|
|                     |      |       |       | std.ratio |                         |      |      |      |
| 35.6                | 96.7 | 100.0 | 100.0 | 1.50      | 29.6                    | 75.1 | 94.3 | 98.8 |
| 27.3                | 91.6 | 100.0 | 100.0 | 1.40      | 23.1                    | 61.3 | 86.1 | 96.1 |
| 19.4                | 80.4 | 100.0 | 100.0 | 1.30      | 15.7                    | 42.9 | 70.4 | 85.5 |
| 15.2                | 69.2 | 99.8  | 100.0 | 1.25      | 12.8                    | 33.0 | 57.3 | 74.5 |
| 12.3                | 55.5 | 99.3  | 100.0 | 1.20      | 10.4                    | 24.3 | 42.7 | 59.0 |
| 8.5                 | 38.6 | 96.8  | 100.0 | 1.15      | 8.2                     | 16.7 | 28.7 | 40.5 |
| 6.7                 | 22.6 | 85.7  | 100.0 | 1.10      | 6.1                     | 10.4 | 16.3 | 22.2 |
| 5.3                 | 9.2  | 48.6  | 98.9  | 1.05      | 5.2                     | 6.5  | 8.2  | 9.5  |
| 1.0 2.0 3.0 4.0     |      |       |       | skewness  | 1.0 2.0 3.0 4.0         |      |      |      |
| gamma distributions |      |       |       | t-test    | lognormal distributions |      |      |      |
|                     |      |       |       | std.ratio |                         |      |      |      |
| 4.7                 | 5.2  | 5.1   | 4.5   | 1.50      | 4.6                     | 4.9  | 5.1  | 4.9  |
| 4.9                 | 5.0  | 4.9   | 5.2   | 1.40      | 5.2                     | 5.0  | 5.0  | 5.1  |
| 5.1                 | 4.8  | 5.0   | 4.8   | 1.30      | 4.6                     | 5.0  | 4.7  | 5.0  |
| 5.2                 | 5.0  | 5.0   | 5.5   | 1.25      | 4.9                     | 5.0  | 4.4  | 5.2  |
| 4.6                 | 5.0  | 4.9   | 5.1   | 1.20      | 5.1                     | 5.1  | 4.6  | 5.0  |
| 4.8                 | 5.4  | 5.7   | 4.8   | 1.15      | 5.1                     | 4.5  | 5.3  | 4.7  |
| 4.7                 | 5.2  | 4.8   | 4.7   | 1.10      | 4.5                     | 5.2  | 4.8  | 4.8  |
| 4.8                 | 5.1  | 5.1   | 5.0   | 1.05      | 4.9                     | 5.1  | 5.2  | 4.9  |
| 1.0 2.0 3.0 4.0     |      |       |       | skewness  | 1.0 2.0 3.0 4.0         |      |      |      |

Table 6.1: Rejection rates (%).

| gamma distributions |      |       |       |           | lognormal distributions |      |      |      |
|---------------------|------|-------|-------|-----------|-------------------------|------|------|------|
|                     |      |       |       | std.ratio |                         |      |      |      |
| 79.3                | 97.7 | 100.0 | 100.0 | 1.50      | 76.9                    | 91.7 | 97.0 | 98.9 |
| 74.9                | 95.7 | 100.0 | 100.0 | 1.40      | 72.7                    | 87.7 | 94.8 | 97.8 |
| 71.2                | 92.9 | 99.9  | 100.0 | 1.30      | 69.3                    | 81.7 | 90.4 | 94.8 |
| 67.8                | 90.4 | 99.6  | 100.0 | 1.25      | 65.2                    | 77.7 | 87.3 | 91.7 |
| 64.7                | 86.0 | 99.3  | 100.0 | 1.20      | 62.7                    | 74.3 | 82.6 | 87.8 |
| 61.2                | 80.2 | 97.7  | 100.0 | 1.15      | 58.9                    | 68.6 | 76.6 | 81.8 |
| 56.2                | 72.1 | 95.0  | 99.9  | 1.10      | 54.2                    | 61.5 | 67.3 | 71.6 |
| 51.6                | 59.7 | 85.3  | 99.2  | 1.05      | 52.1                    | 53.7 | 54.5 | 58.1 |
| 1.0 2.0 3.0 4.0     |      |       |       | skewness  | 1.0 2.0 3.0 4.0         |      |      |      |

Table 6.2: Estimated probabilities (%) that the  $p$ -value of the WMW test is smaller than that of the t-test.

1000 subjects in each group

| gamma distributions |       |       |       | WMW test  | lognormal distributions |      |      |       |
|---------------------|-------|-------|-------|-----------|-------------------------|------|------|-------|
|                     |       |       |       | std.ratio |                         |      |      |       |
| 61.7                | 100.0 | 100.0 | 100.0 | 1.50      | 52.9                    | 95.6 | 99.9 | 100.0 |
| 48.9                | 99.8  | 100.0 | 100.0 | 1.40      | 39.9                    | 88.6 | 99.1 | 99.9  |
| 33.9                | 97.7  | 100.0 | 100.0 | 1.30      | 27.4                    | 71.8 | 93.7 | 99.1  |
| 26.1                | 93.8  | 100.0 | 100.0 | 1.25      | 21.4                    | 59.2 | 85.3 | 96.2  |
| 19.6                | 83.7  | 100.0 | 100.0 | 1.20      | 16.4                    | 44.5 | 71.0 | 87.3  |
| 13.6                | 65.7  | 100.0 | 100.0 | 1.15      | 11.9                    | 28.4 | 49.8 | 67.6  |
| 8.6                 | 39.1  | 98.8  | 100.0 | 1.10      | 8.0                     | 15.6 | 27.6 | 39.5  |
| 5.8                 | 14.4  | 78.6  | 100.0 | 1.05      | 6.1                     | 7.8  | 10.3 | 14.5  |
| 1.0                 | 2.0   | 3.0   | 4.0   | skewness  | 1.0                     | 2.0  | 3.0  | 4.0   |
| gamma distributions |       |       |       | t-test    | lognormal distributions |      |      |       |
|                     |       |       |       | std.ratio |                         |      |      |       |
| 4.7                 | 5.0   | 4.9   | 5.3   | 1.50      | 4.7                     | 4.9  | 5.0  | 5.0   |
| 4.9                 | 5.0   | 5.0   | 4.8   | 1.40      | 4.8                     | 5.1  | 5.1  | 4.8   |
| 4.9                 | 5.0   | 4.4   | 5.1   | 1.30      | 4.9                     | 4.8  | 5.2  | 5.2   |
| 5.7                 | 4.7   | 5.0   | 5.1   | 1.25      | 5.0                     | 5.2  | 4.7  | 4.9   |
| 5.0                 | 4.7   | 5.2   | 5.2   | 1.20      | 5.1                     | 4.8  | 5.1  | 4.7   |
| 5.5                 | 4.8   | 5.1   | 5.2   | 1.15      | 4.8                     | 5.1  | 5.2  | 5.1   |
| 4.8                 | 5.0   | 5.1   | 4.9   | 1.10      | 5.2                     | 5.0  | 4.9  | 5.2   |
| 4.8                 | 4.4   | 4.9   | 4.8   | 1.05      | 5.1                     | 4.8  | 5.0  | 4.9   |
| 1.0                 | 2.0   | 3.0   | 4.0   | skewness  | 1.0                     | 2.0  | 3.0  | 4.0   |

Table 7.1: Rejection rates (%).

| gamma distributions |      |       |       |           | lognormal distributions |      |      |       |
|---------------------|------|-------|-------|-----------|-------------------------|------|------|-------|
|                     |      |       |       | std.ratio |                         |      |      |       |
| 87.0                | 99.7 | 100.0 | 100.0 | 1.50      | 84.6                    | 97.3 | 99.6 | 100.0 |
| 83.6                | 99.3 | 100.0 | 100.0 | 1.40      | 80.1                    | 94.9 | 98.9 | 99.7  |
| 78.2                | 97.9 | 100.0 | 100.0 | 1.30      | 75.2                    | 90.9 | 96.7 | 99.0  |
| 75.1                | 96.6 | 100.0 | 100.0 | 1.25      | 71.8                    | 87.0 | 94.3 | 97.6  |
| 70.7                | 93.9 | 100.0 | 100.0 | 1.20      | 67.6                    | 82.3 | 90.5 | 95.1  |
| 66.6                | 89.5 | 99.8  | 100.0 | 1.15      | 65.9                    | 75.8 | 85.1 | 90.1  |
| 60.9                | 81.2 | 98.8  | 100.0 | 1.10      | 58.2                    | 67.7 | 76.2 | 80.9  |
| 53.3                | 66.3 | 92.7  | 100.0 | 1.05      | 54.2                    | 57.2 | 60.6 | 63.8  |
| 1.0                 | 2.0  | 3.0   | 4.0   | skewness  | 1.0                     | 2.0  | 3.0  | 4.0   |

Table 7.2: Estimated probabilities (%) that the  $p$ -value of the WMW test is smaller than that of the t-test.



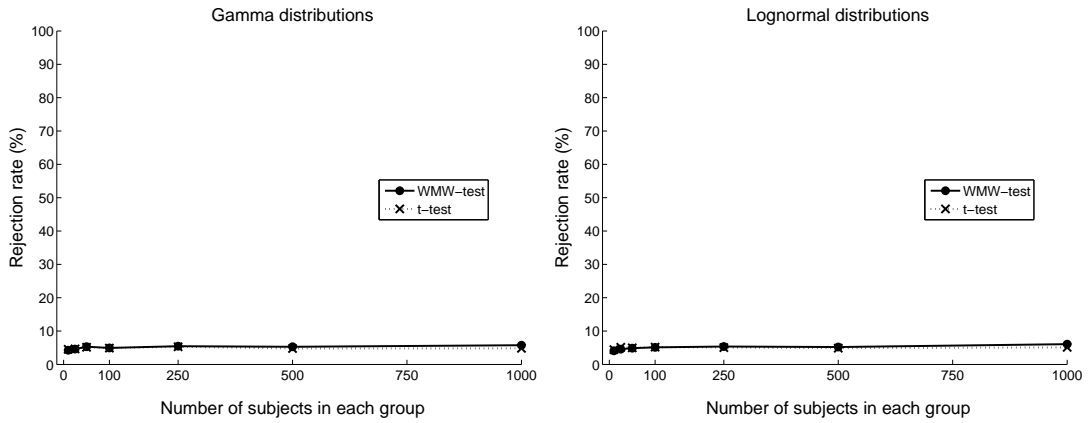

Figure 1: Rejection rates ( $p < 0.05$ ) for a standard deviation ratio of 1.05 and a skewness of 1.0.

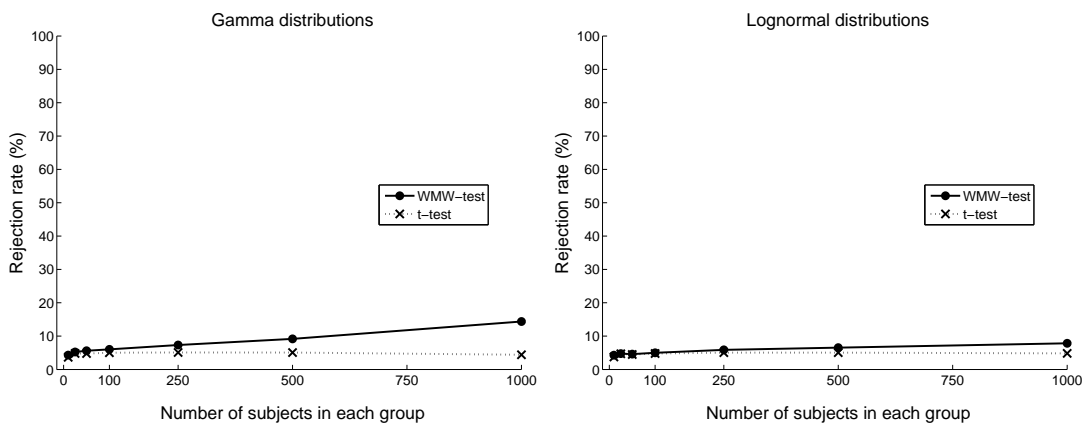

Figure 2: Rejection rates ( $p < 0.05$ ) for a standard deviation ratio of 1.05 and a skewness of 2.0.

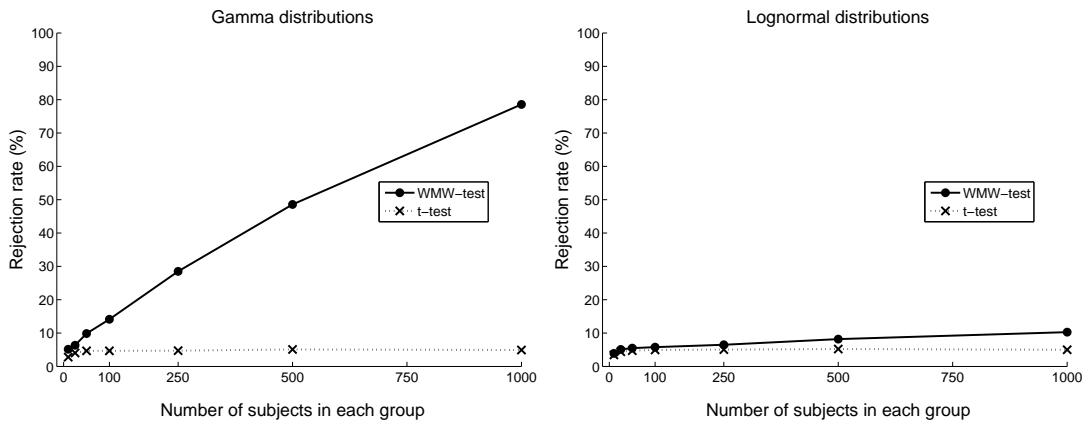

Figure 3: Rejection rates ( $p < 0.05$ ) for a standard deviation ratio of 1.05 and a skewness of 3.0.

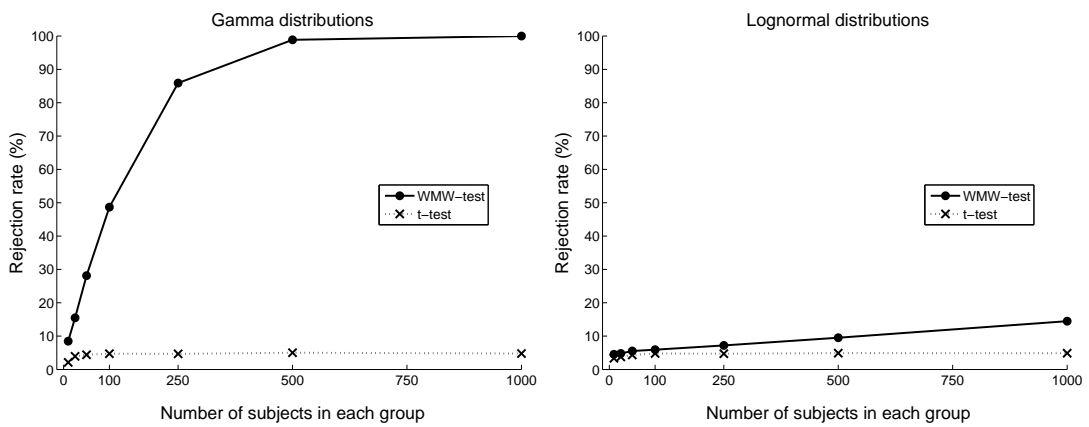

Figure 4: Rejection rates ( $p < 0.05$ ) for a standard deviation ratio of 1.05 and a skewness of 4.0.

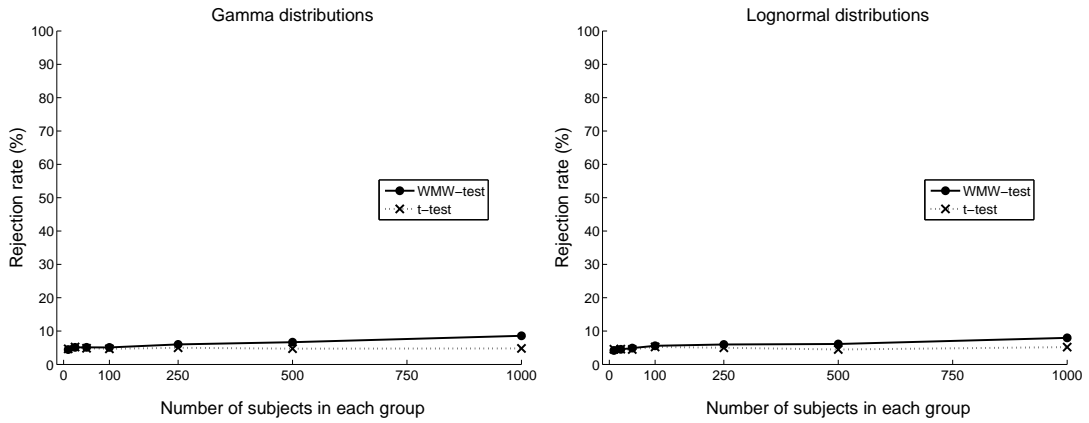

Figure 5: Rejection rates ( $p < 0.05$ ) for a standard deviation ratio of 1.10 and a skewness of 1.0.

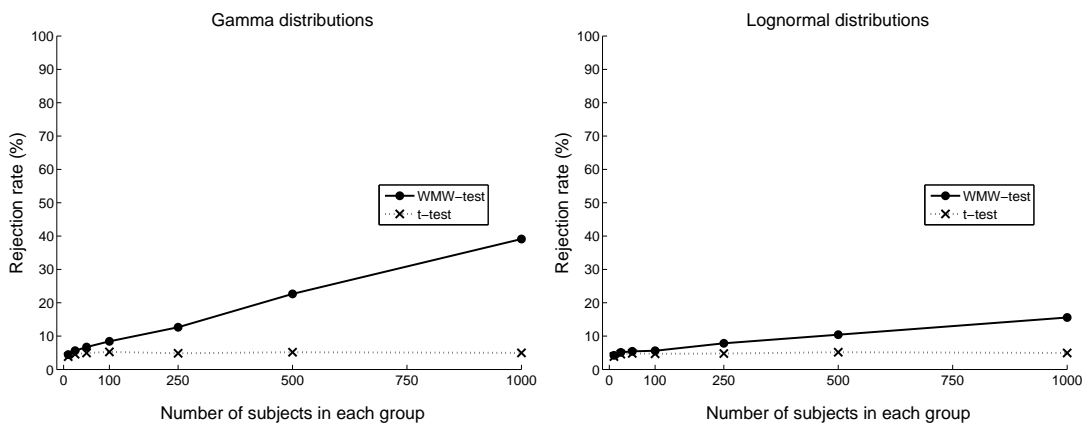

Figure 6: Rejection rates ( $p < 0.05$ ) for a standard deviation ratio of 1.10 and a skewness of 2.0.

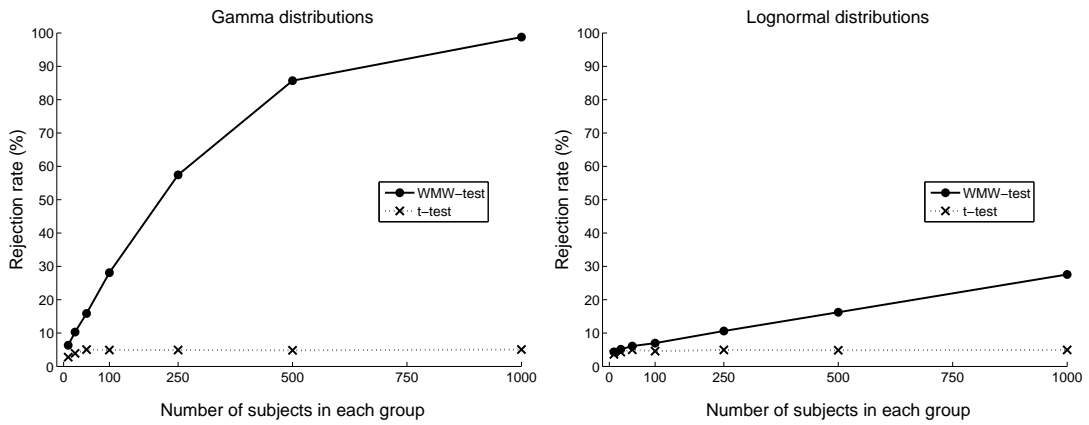

Figure 7: Rejection rates ( $p < 0.05$ ) for a standard deviation ratio of 1.10 and a skewness of 3.0.

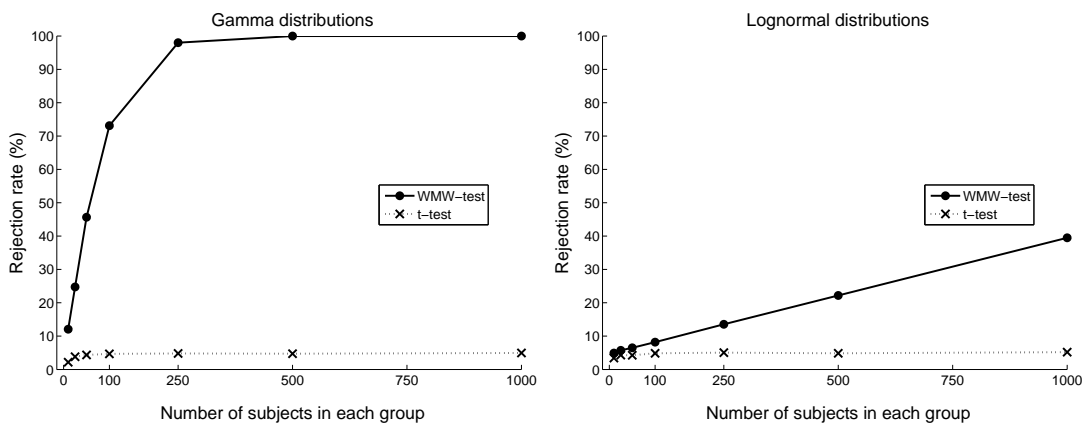

Figure 8: Rejection rates ( $p < 0.05$ ) for a standard deviation ratio of 1.10 and a skewness of 4.0.

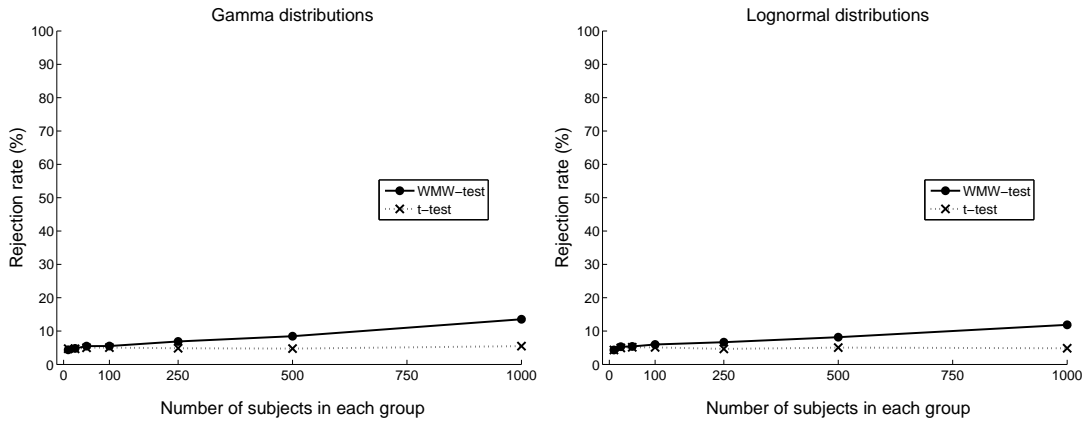

Figure 9: Rejection rates ( $p < 0.05$ ) for a standard deviation ratio of 1.15 and a skewness of 1.0.

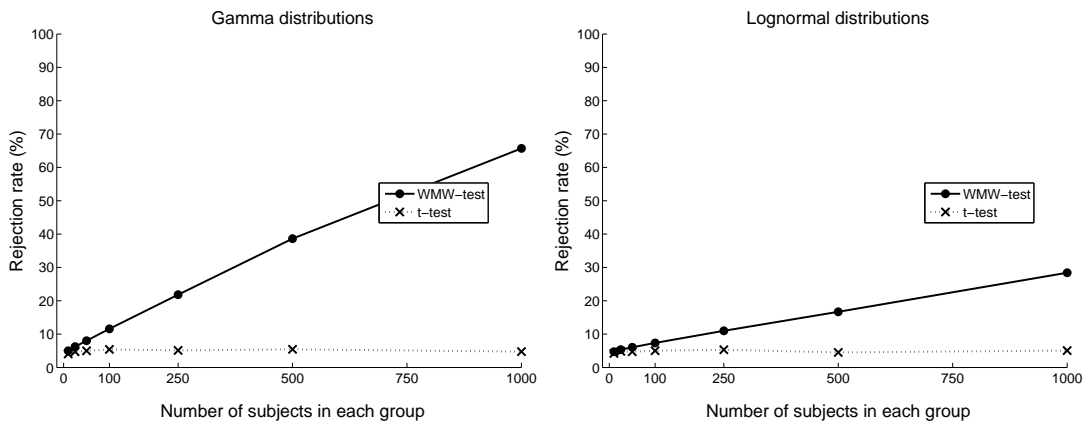

Figure 10: Rejection rates ( $p < 0.05$ ) for a standard deviation ratio of 1.15 and a skewness of 2.0.

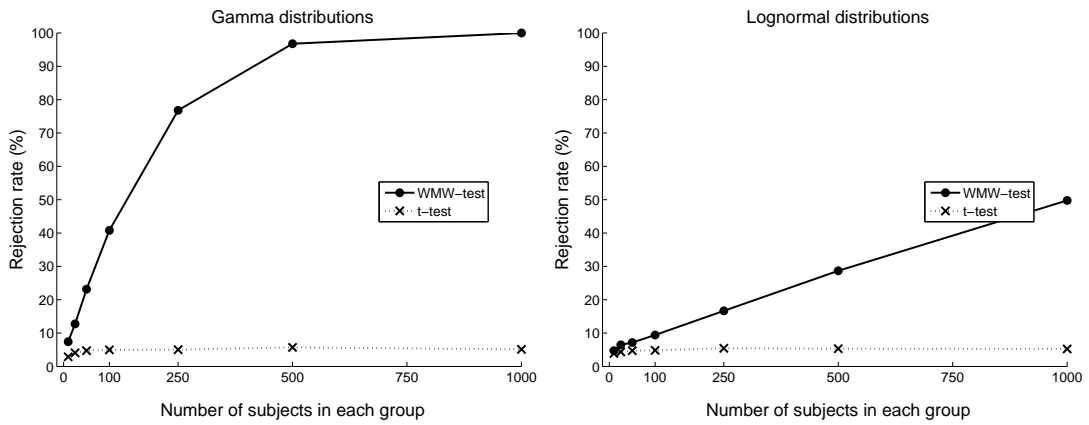

Figure 11: Rejection rates ( $p < 0.05$ ) for a standard deviation ratio of 1.15 and a skewness of 3.0.

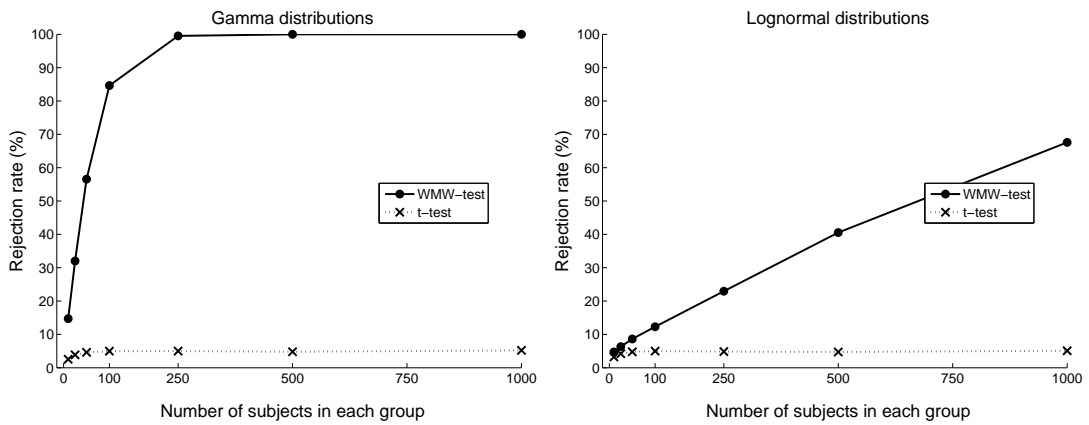

Figure 12: Rejection rates ( $p < 0.05$ ) for a standard deviation ratio of 1.15 and a skewness of 4.0.

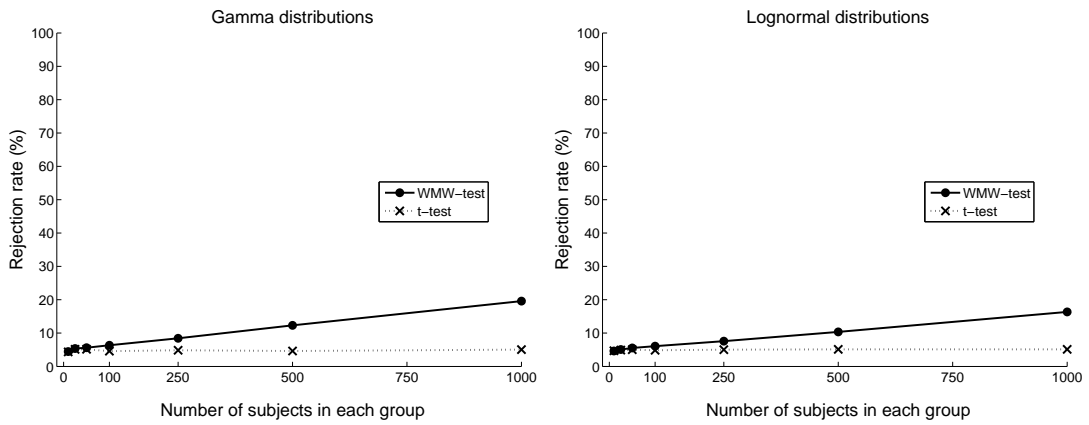

Figure 13: Rejection rates ( $p < 0.05$ ) for a standard deviation ratio of 1.20 and a skewness of 1.0.

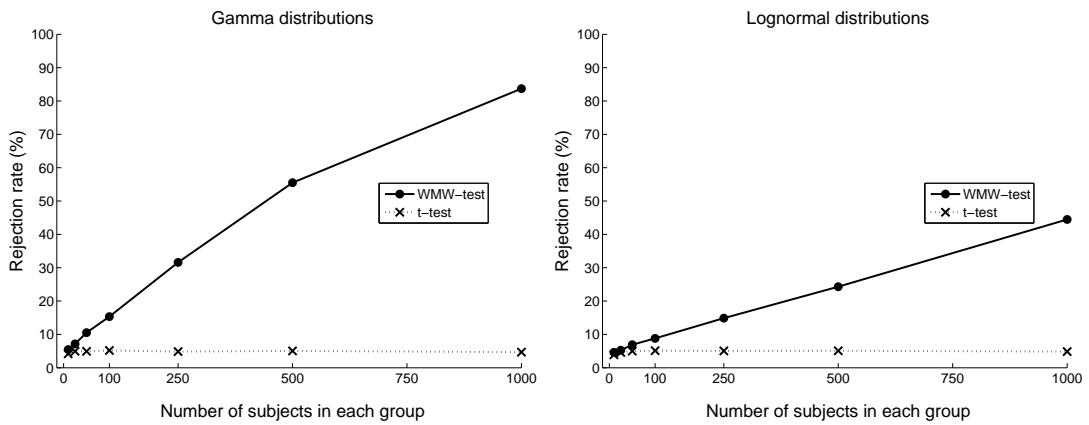

Figure 14: Rejection rates ( $p < 0.05$ ) for a standard deviation ratio of 1.20 and a skewness of 2.0.

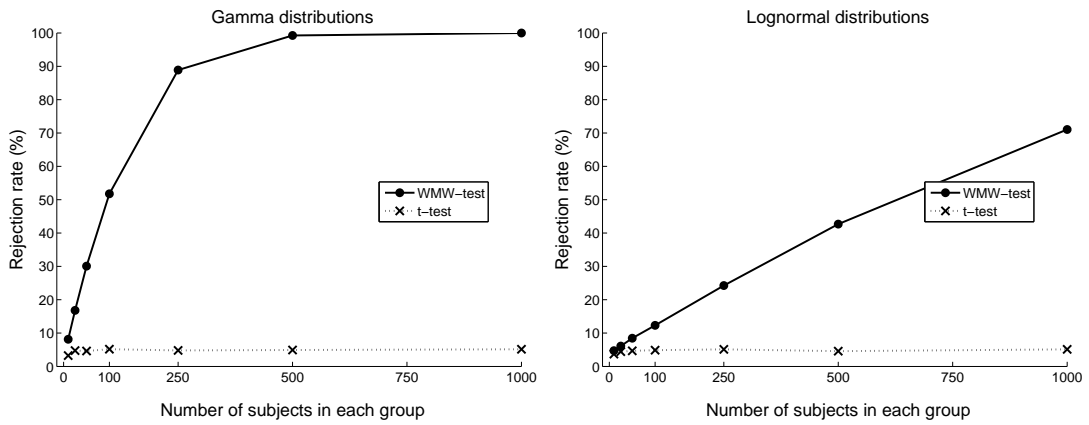

Figure 15: Rejection rates ( $p < 0.05$ ) for a standard deviation ratio of 1.20 and a skewness of 3.0.

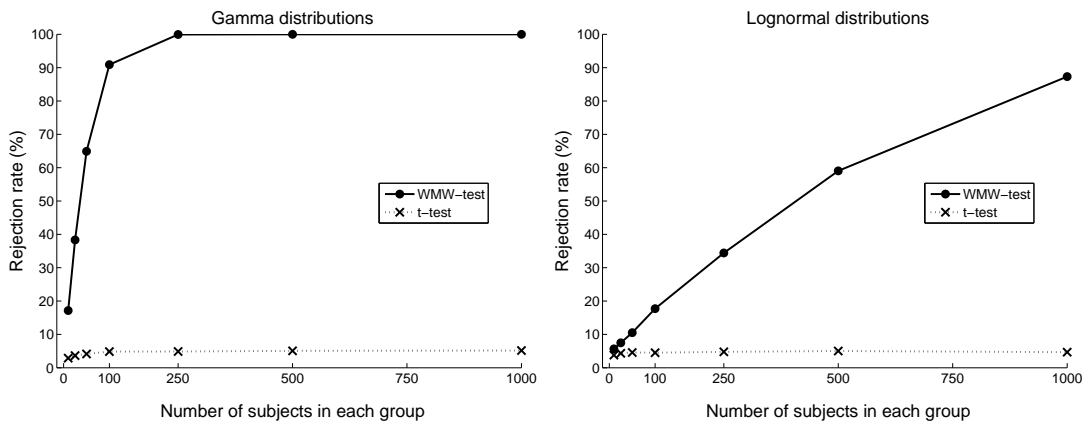

Figure 16: Rejection rates ( $p < 0.05$ ) for a standard deviation ratio of 1.20 and a skewness of 4.0.



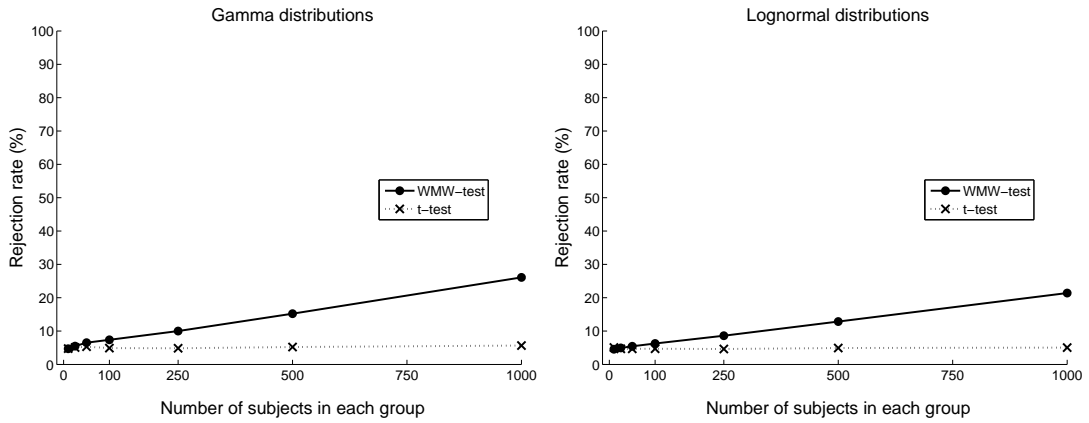

Figure 17: Rejection rates ( $p < 0.05$ ) for a standard deviation ratio of 1.25 and a skewness of 1.0.

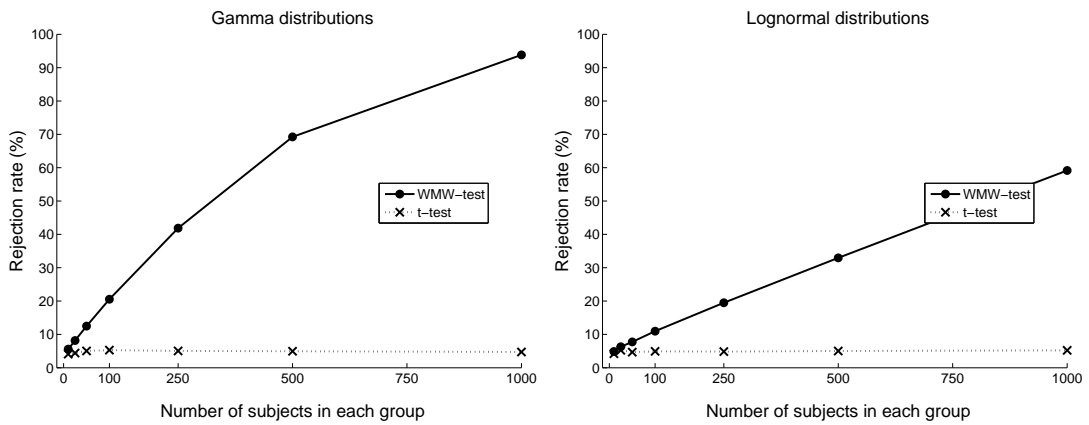

Figure 18: Rejection rates ( $p < 0.05$ ) for a standard deviation ratio of 1.25 and a skewness of 2.0.

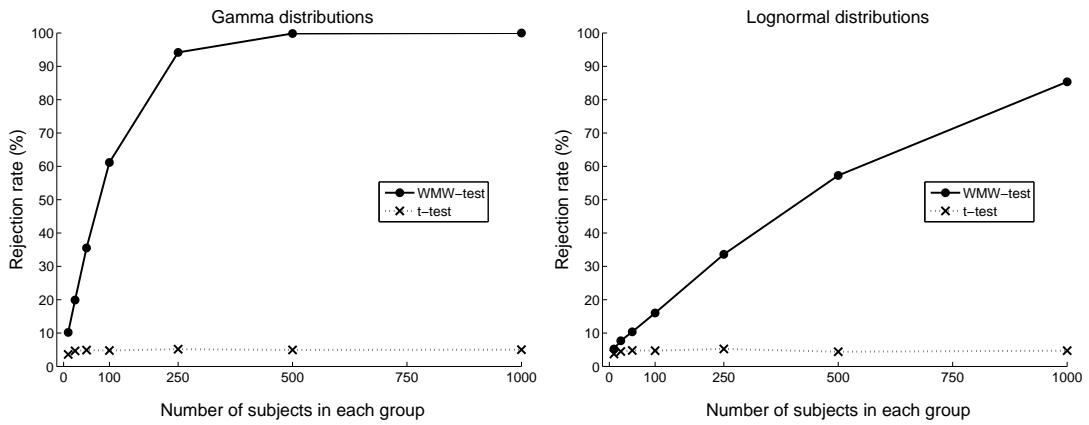

Figure 19: Rejection rates ( $p < 0.05$ ) for a standard deviation ratio of 1.25 and a skewness of 3.0.

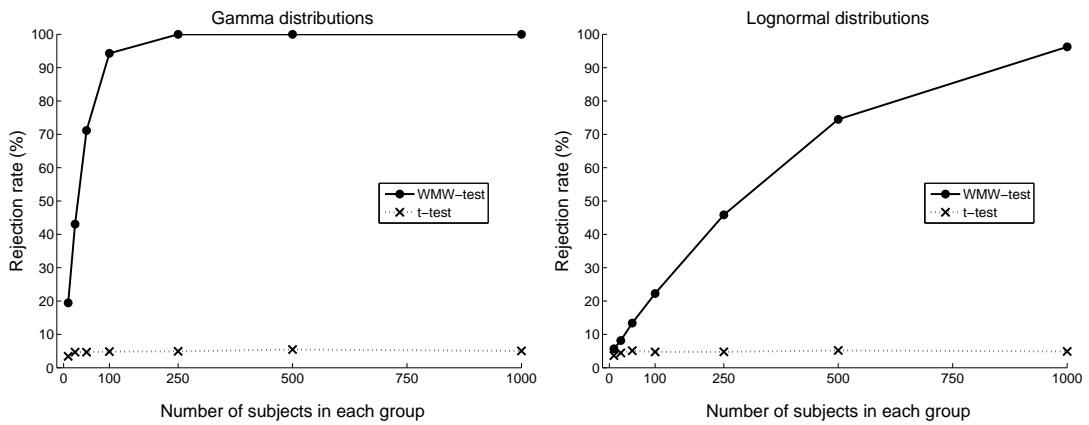

Figure 20: Rejection rates ( $p < 0.05$ ) for a standard deviation ratio of 1.25 and a skewness of 4.0.

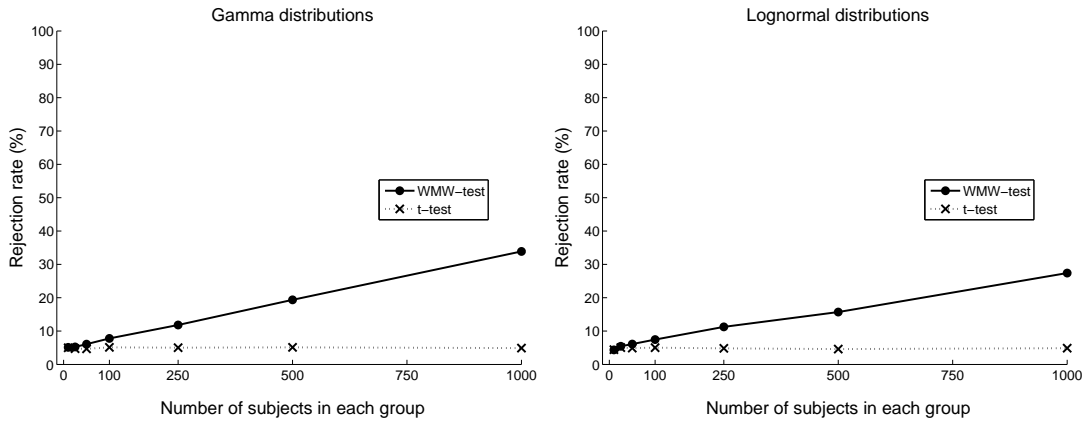

Figure 21: Rejection rates ( $p < 0.05$ ) for a standard deviation ratio of 1.30 and a skewness of 1.0.

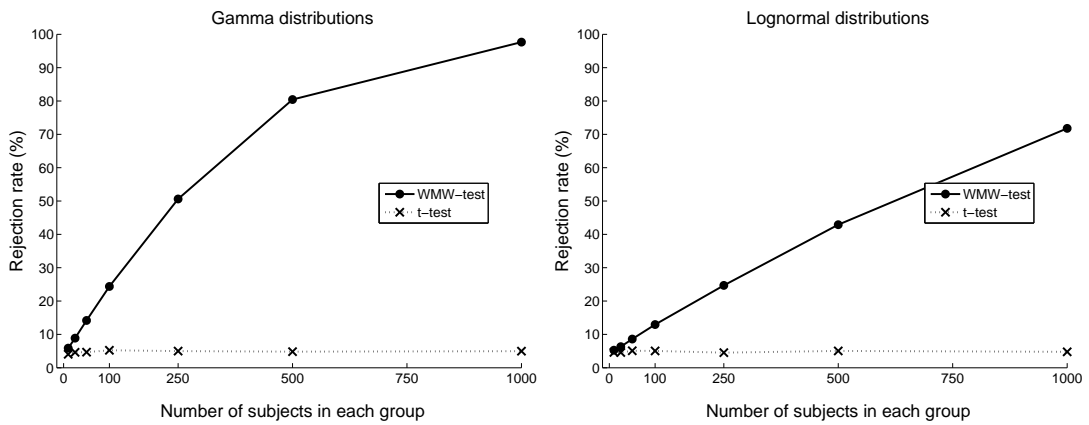

Figure 22: Rejection rates ( $p < 0.05$ ) for a standard deviation ratio of 1.30 and a skewness of 2.0.

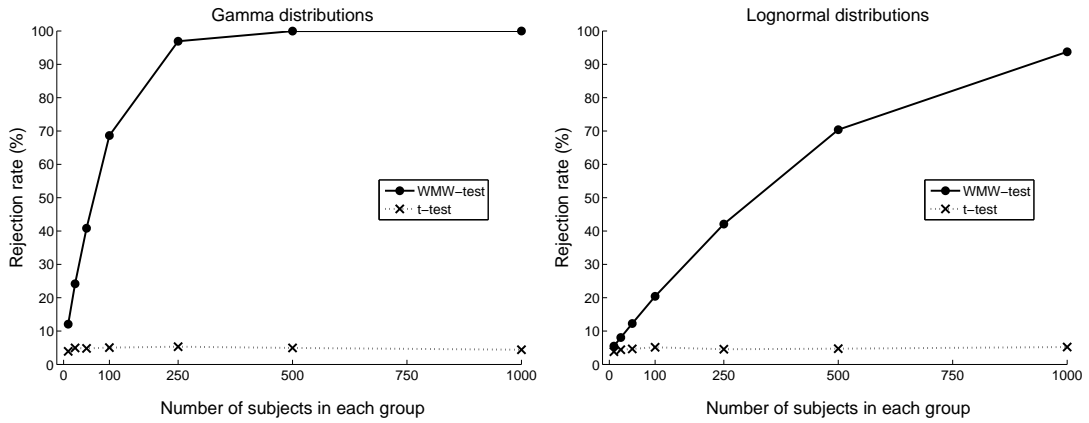

Figure 23: Rejection rates ( $p < 0.05$ ) for a standard deviation ratio of 1.30 and a skewness of 3.0.

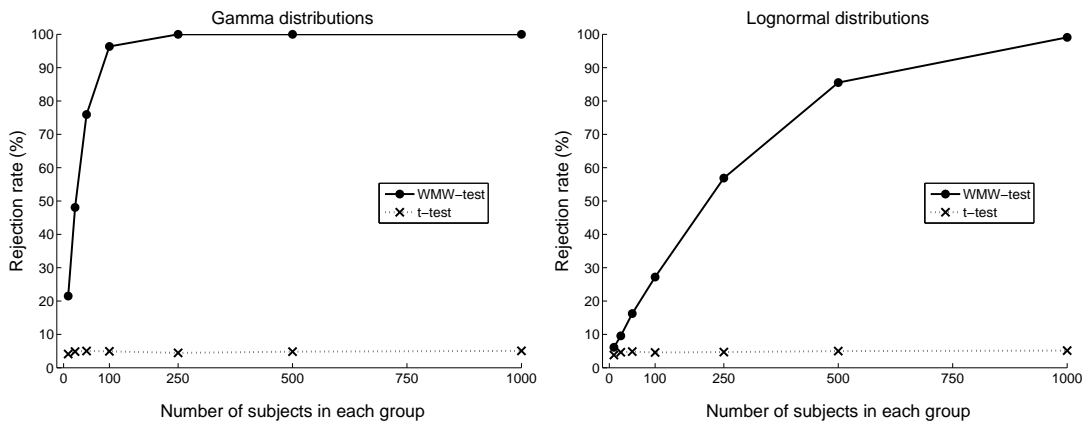

Figure 24: Rejection rates ( $p < 0.05$ ) for a standard deviation ratio of 1.30 and a skewness of 4.0.

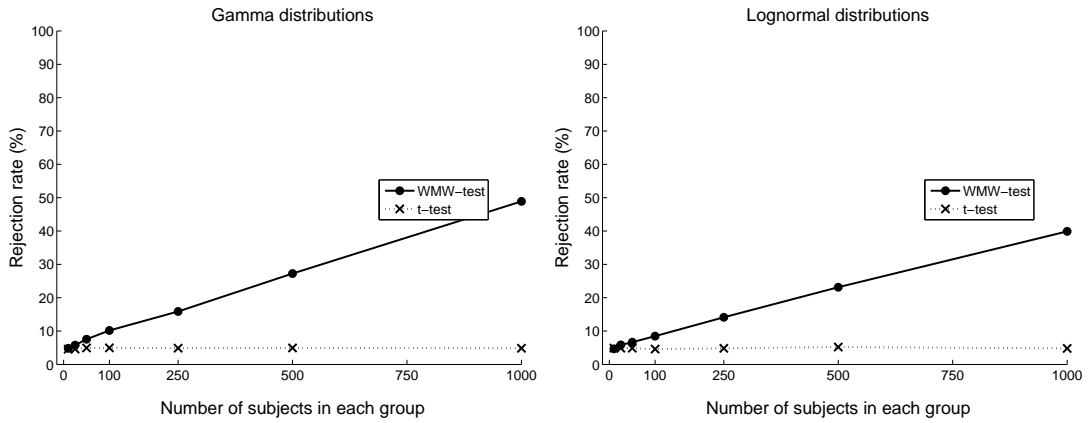

Figure 25: Rejection rates ( $p < 0.05$ ) for a standard deviation ratio of 1.40 and a skewness of 1.0.

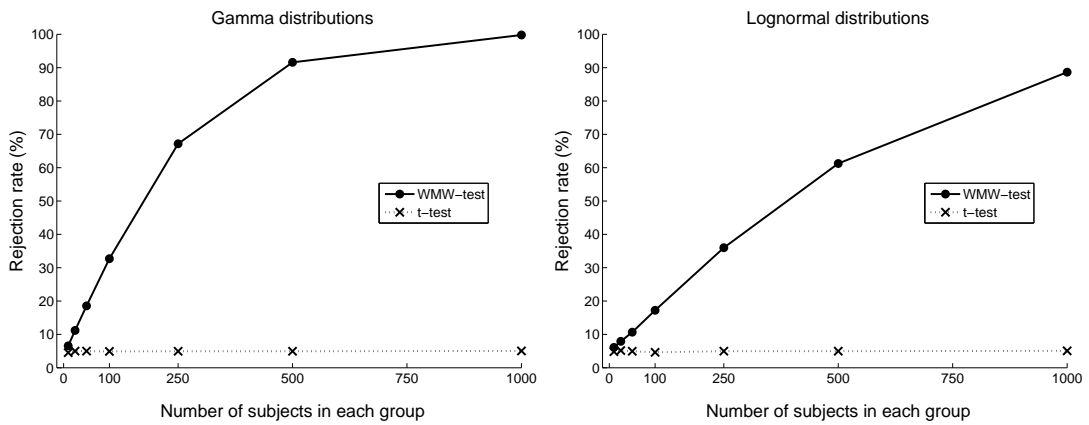

Figure 26: Rejection rates ( $p < 0.05$ ) for a standard deviation ratio of 1.40 and a skewness of 2.0.

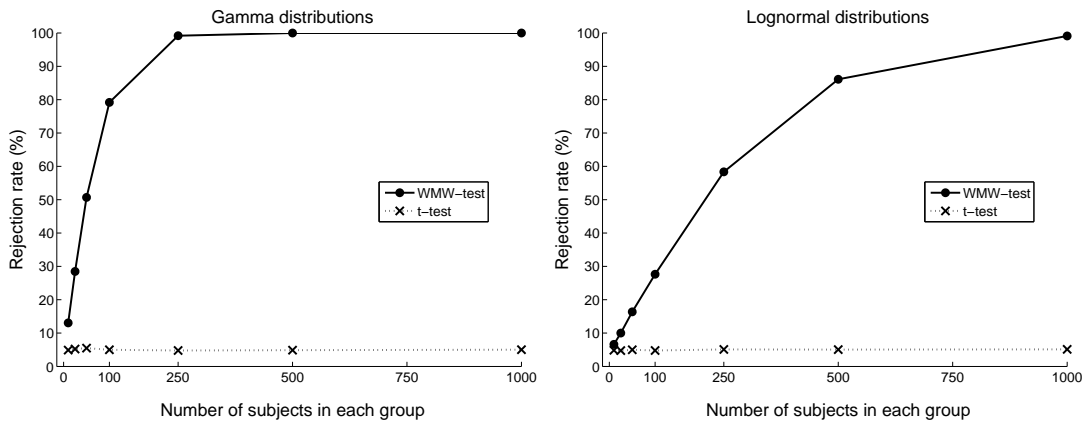

Figure 27: Rejection rates ( $p < 0.05$ ) for a standard deviation ratio of 1.40 and a skewness of 3.0.

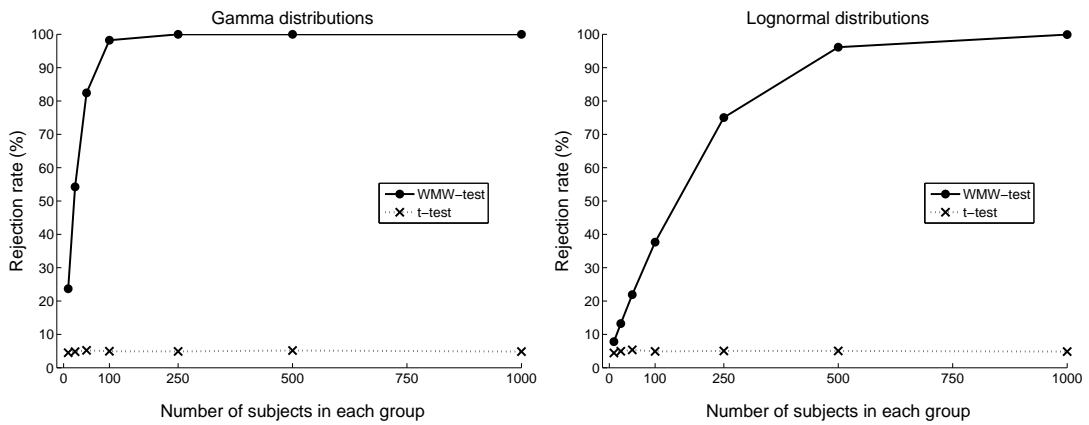

Figure 28: Rejection rates ( $p < 0.05$ ) for a standard deviation ratio of 1.40 and a skewness of 4.0.

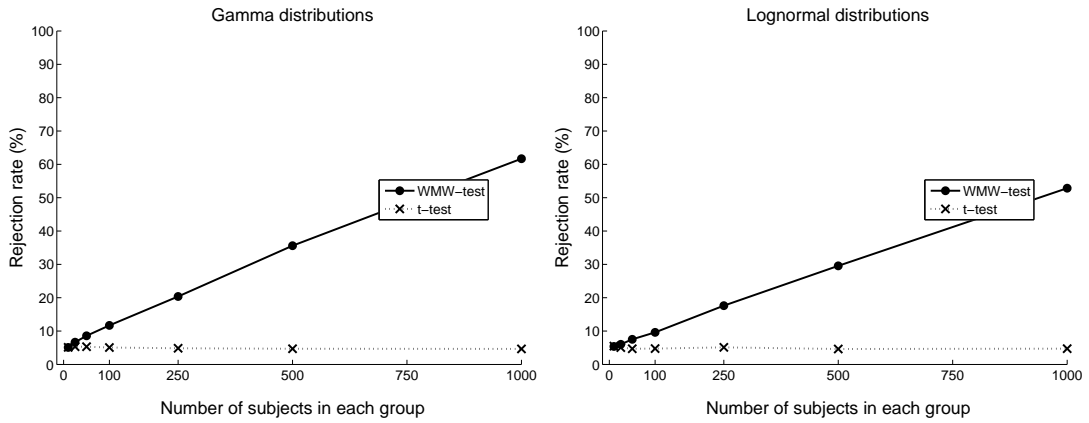

Figure 29: Rejection rates ( $p < 0.05$ ) for a standard deviation ratio of 1.50 and a skewness of 1.0.

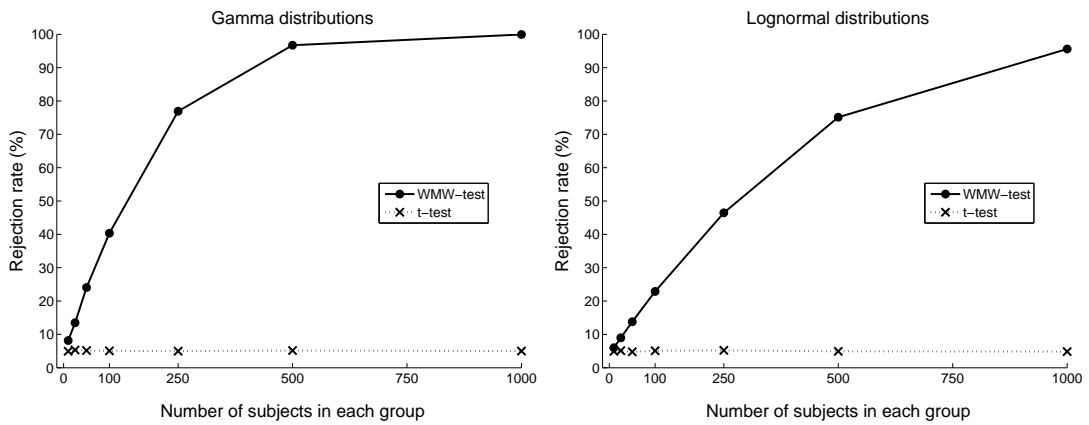

Figure 30: Rejection rates ( $p < 0.05$ ) for a standard deviation ratio of 1.50 and a skewness of 2.0.

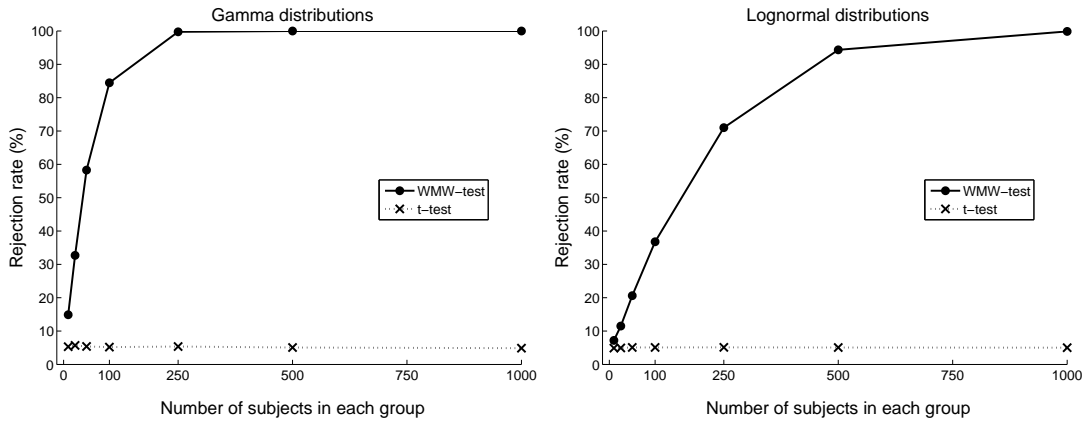

Figure 31: Rejection rates ( $p < 0.05$ ) for a standard deviation ratio of 1.50 and a skewness of 3.0.

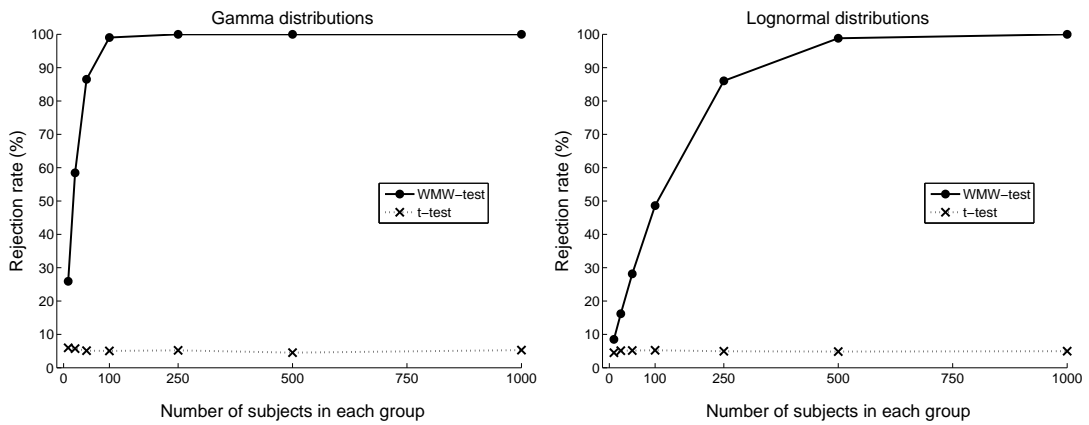

Figure 32: Rejection rates ( $p < 0.05$ ) for a standard deviation ratio of 1.50 and a skewness of 4.0.
